# Supplementary material for: Capsaicin and Dihydrocapsaicin Determination in Chili Pepper Genotypes Using Ultra-Fast Liquid Chromatography
Source: MDPI journal article supplement (doi:10.3390/molecules19056474), 2014-05-21

# Supplementary File

**Figure S1.** Calibration curve for Capsaicin.

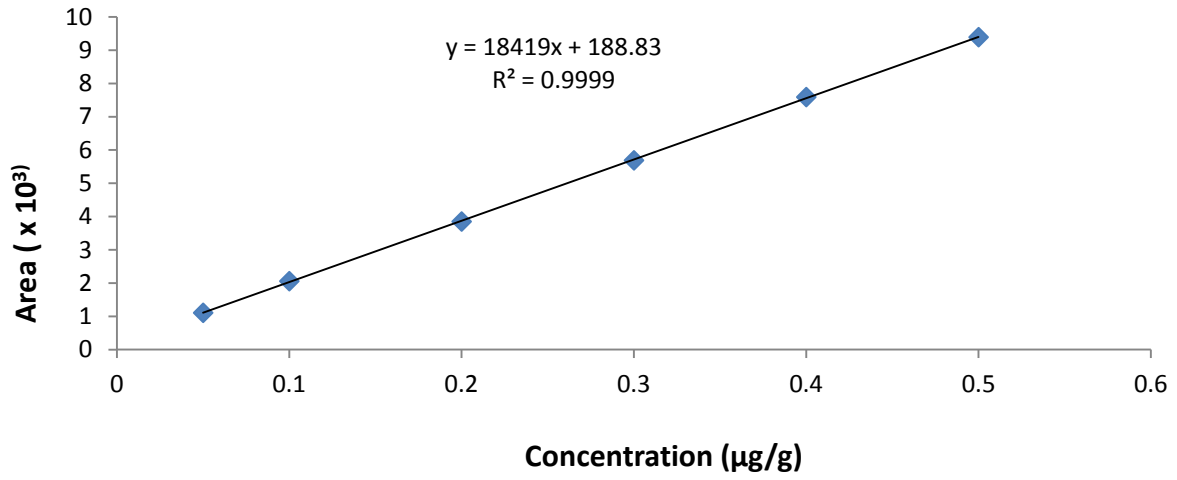

**Figure S2.** Calibration curve for Dihydrocapsaicin.

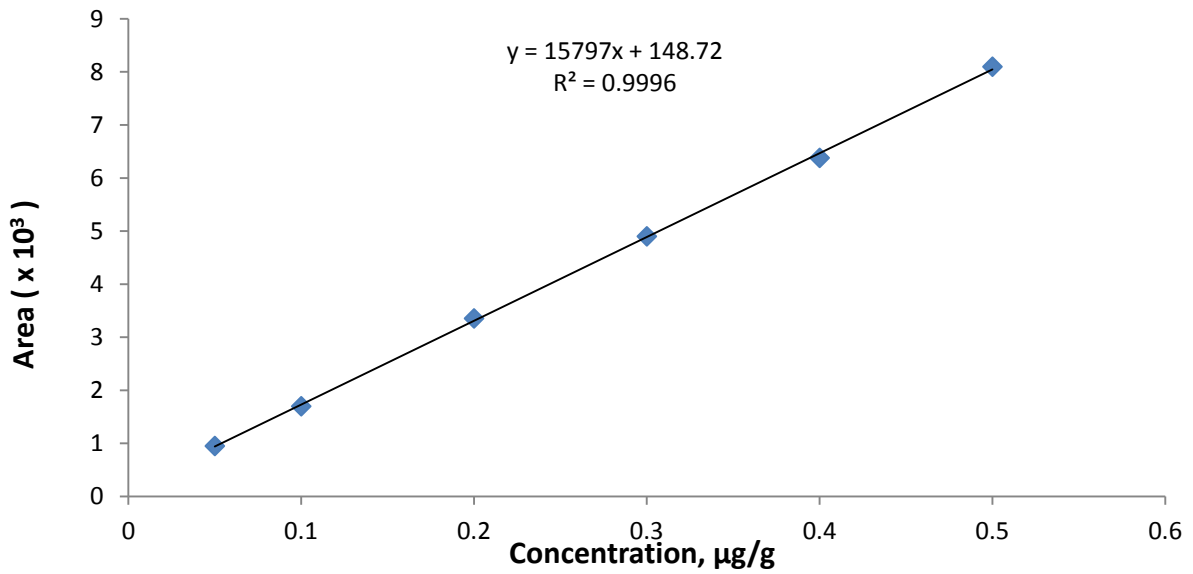

**Figure S3.** Expected and actual response plotted against expected concentrations for capsaicin.

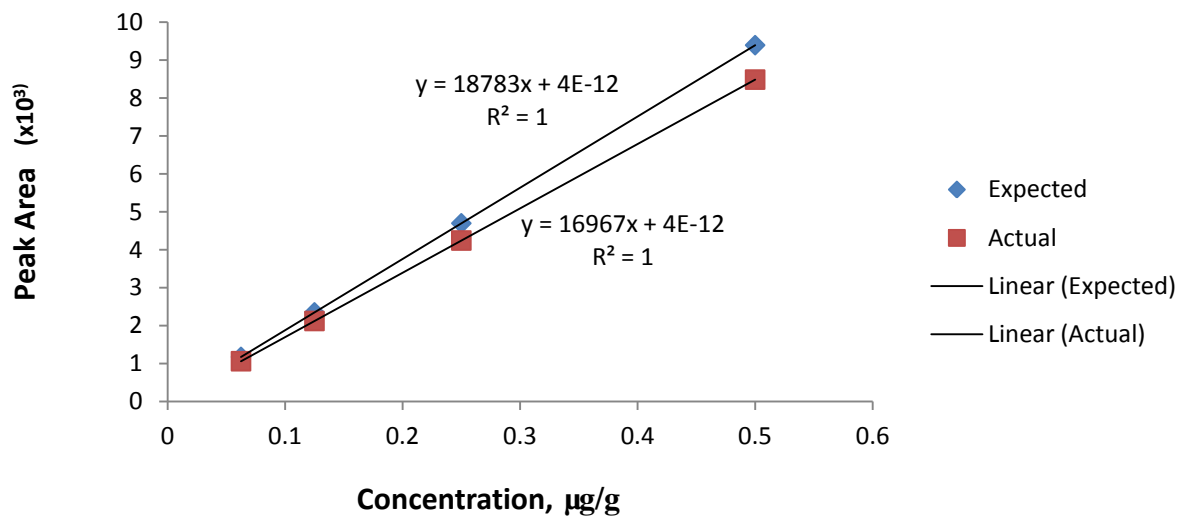

**Figure S4.** Expected and actual response plotted against expected concentrations for dihydrocapsaicin.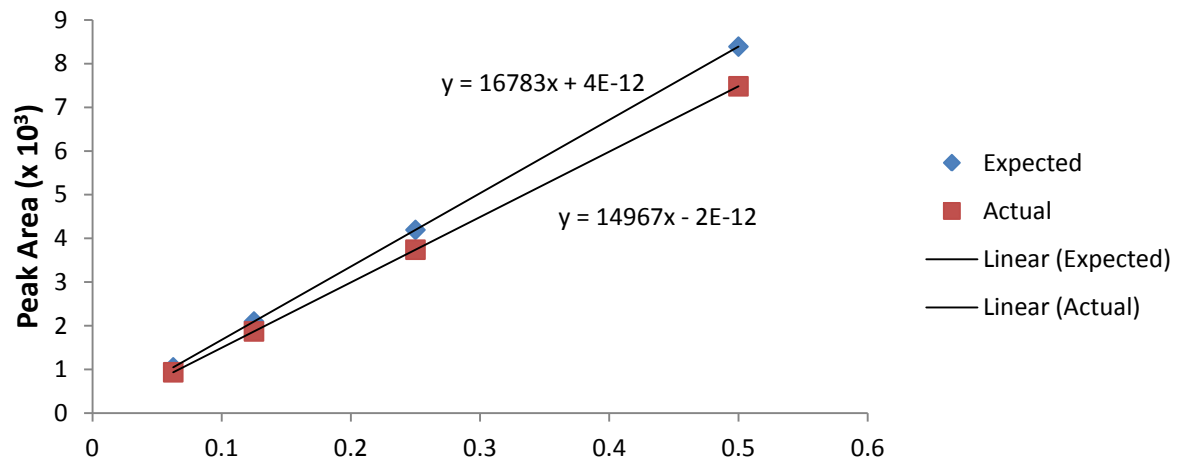**Figure S5.** The chromatogram of an extracted solution of some genotypes. (a) Blank Sample (AVPP0803) – Non pungent; (b) AVPP0514 (Highly Pungent); and (c) C05573 (Very Highly Pungent).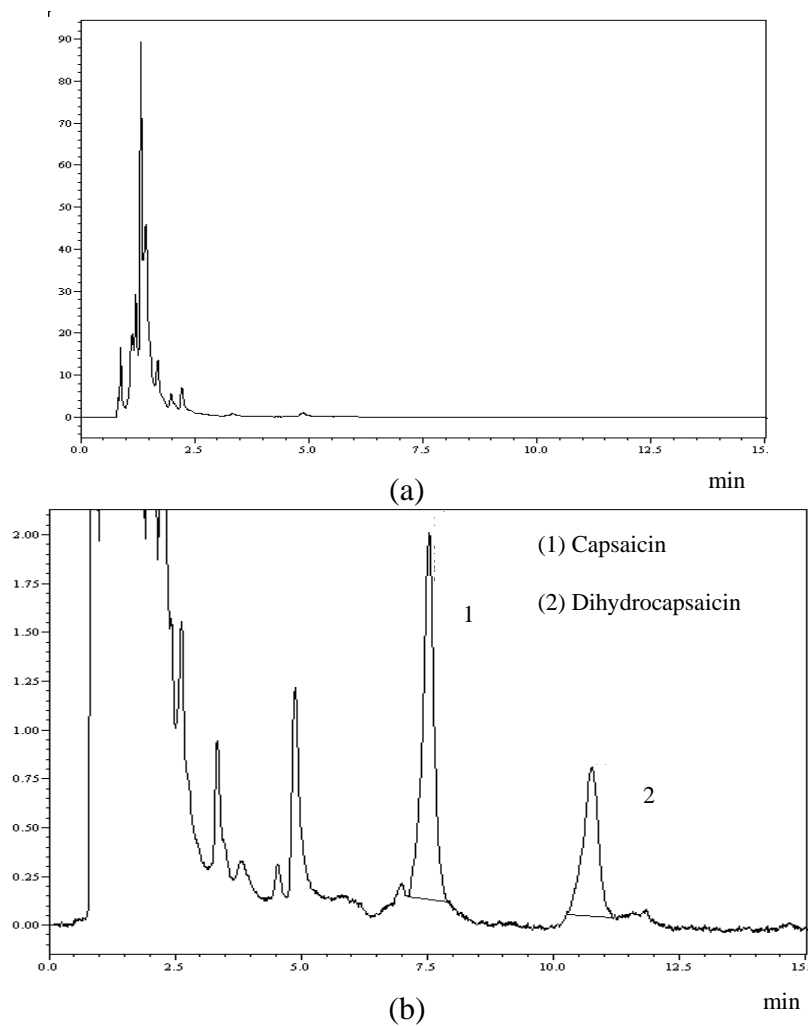

Figure S5. Cont.

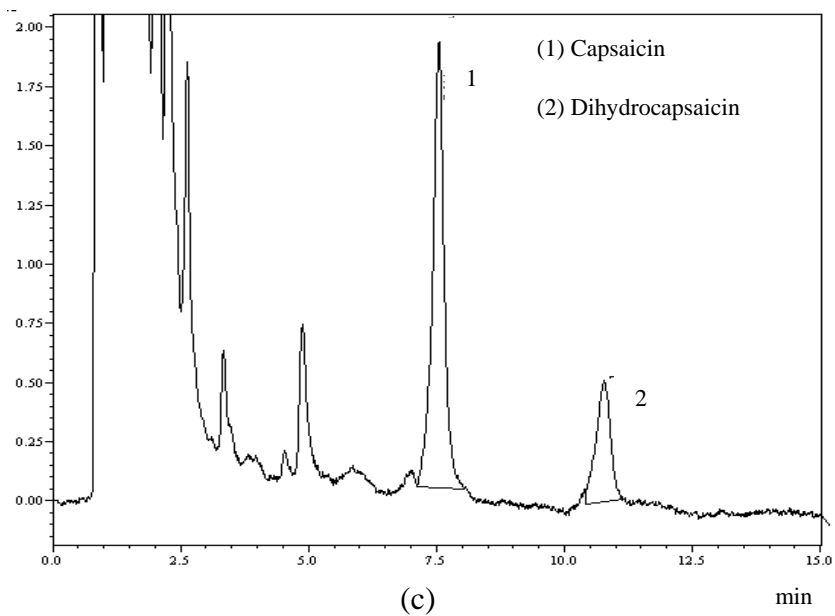

Supplement: s1 [file s1]
